# Supplementary material
Source: ML conference proceedings conference paper supplement (https://aclanthology.org/2026.semeval-1.187)
Supplement: SupplementaryMaterial [file calibration_collapse.pdf › figures/calibration_collapse.pdf]

# Calibration collapse vs per-language Z-score alignment

Per-language Z-scores

Raw probabilities

Count

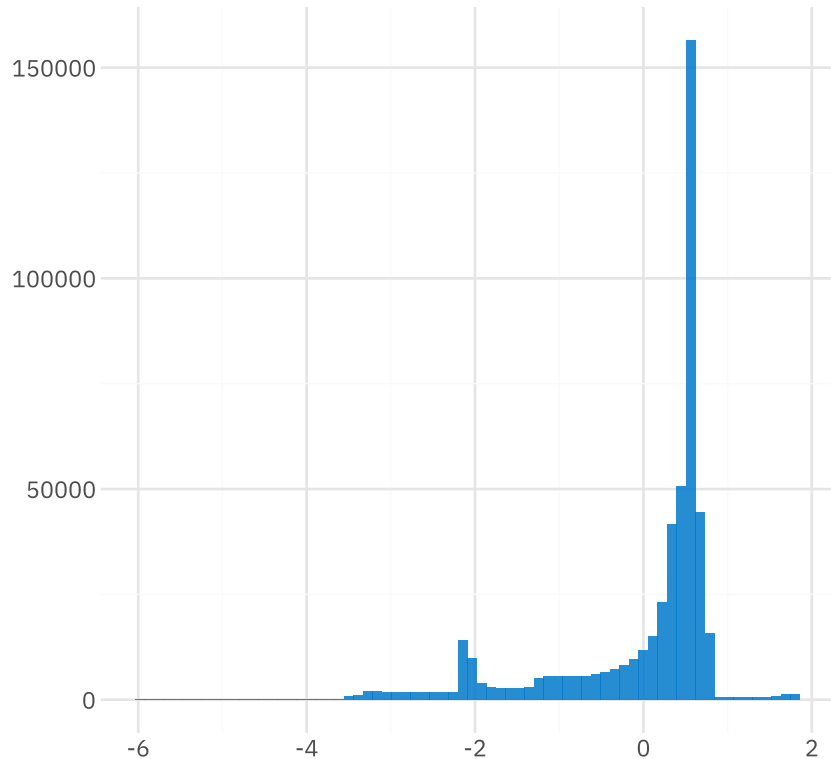

Value

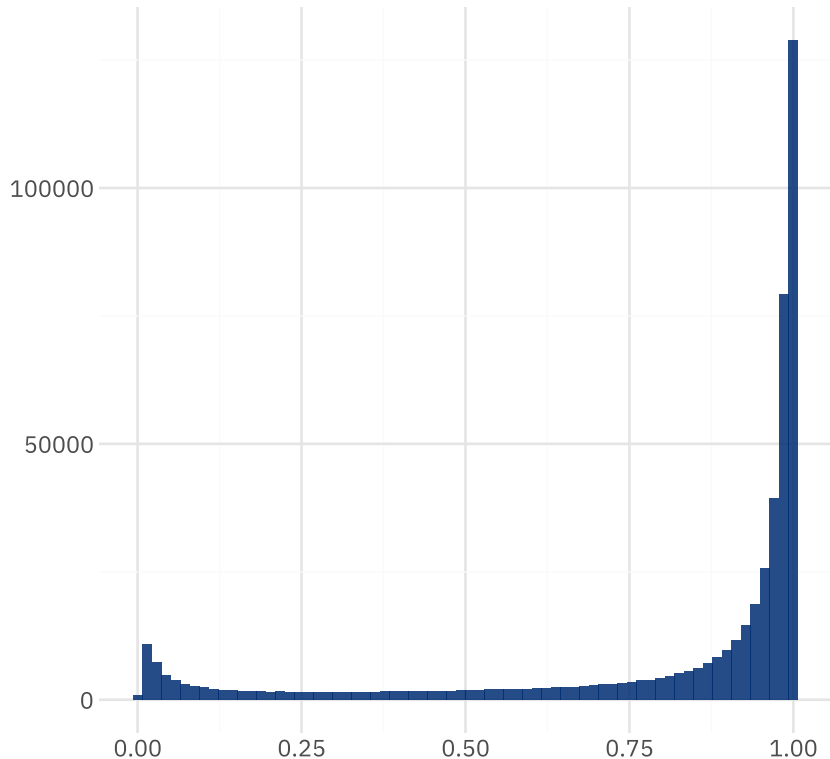

View

- Per-language Z-scores
- Raw probabilities
