# Supplementary material
Source: ML conference proceedings conference paper supplement (https://aclanthology.org/2026.semeval-1.187)

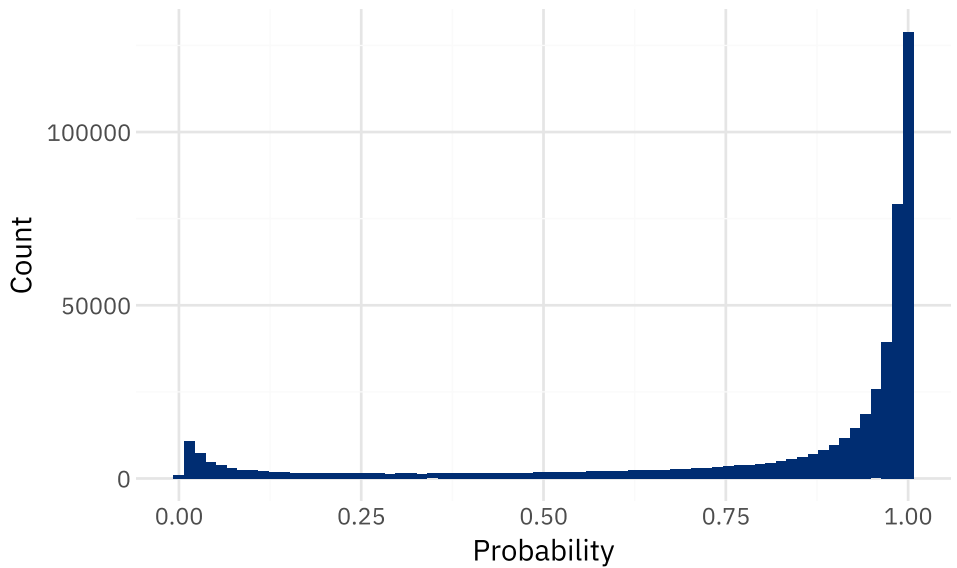

Supplement: SupplementaryMaterial [file calibration_collapse_raw.pdf › figures/calibration_collapse_raw.pdf]

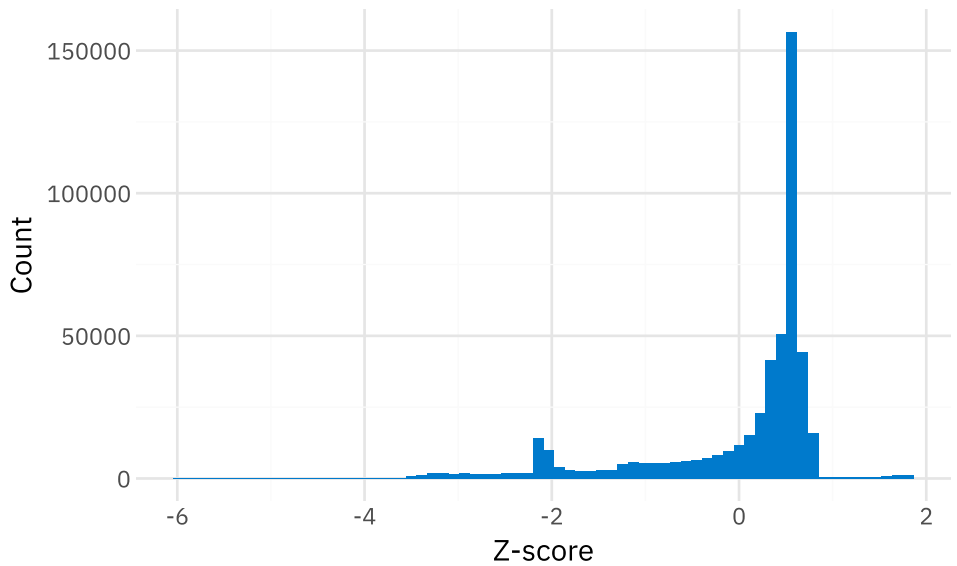

Supplement: SupplementaryMaterial [file calibration_collapse_zscore.pdf › figures/calibration_collapse_zscore.pdf]

Performance vs code length

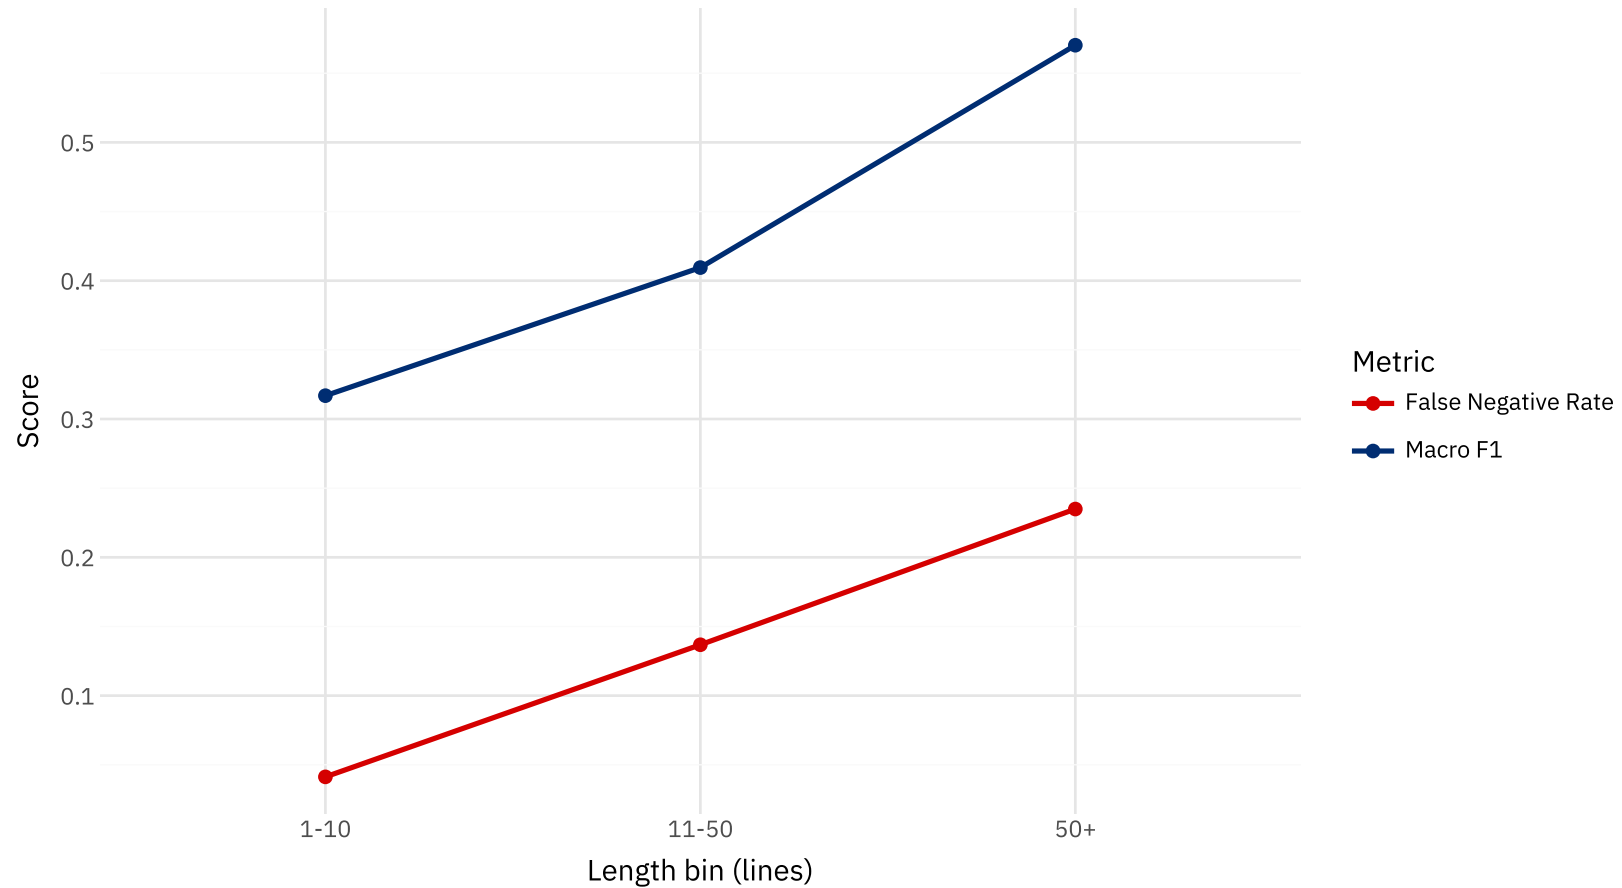

Supplement: SupplementaryMaterial [file error_by_length.pdf › figures/error_by_length.pdf]

Top unstable and stable features by KS shift

Feature

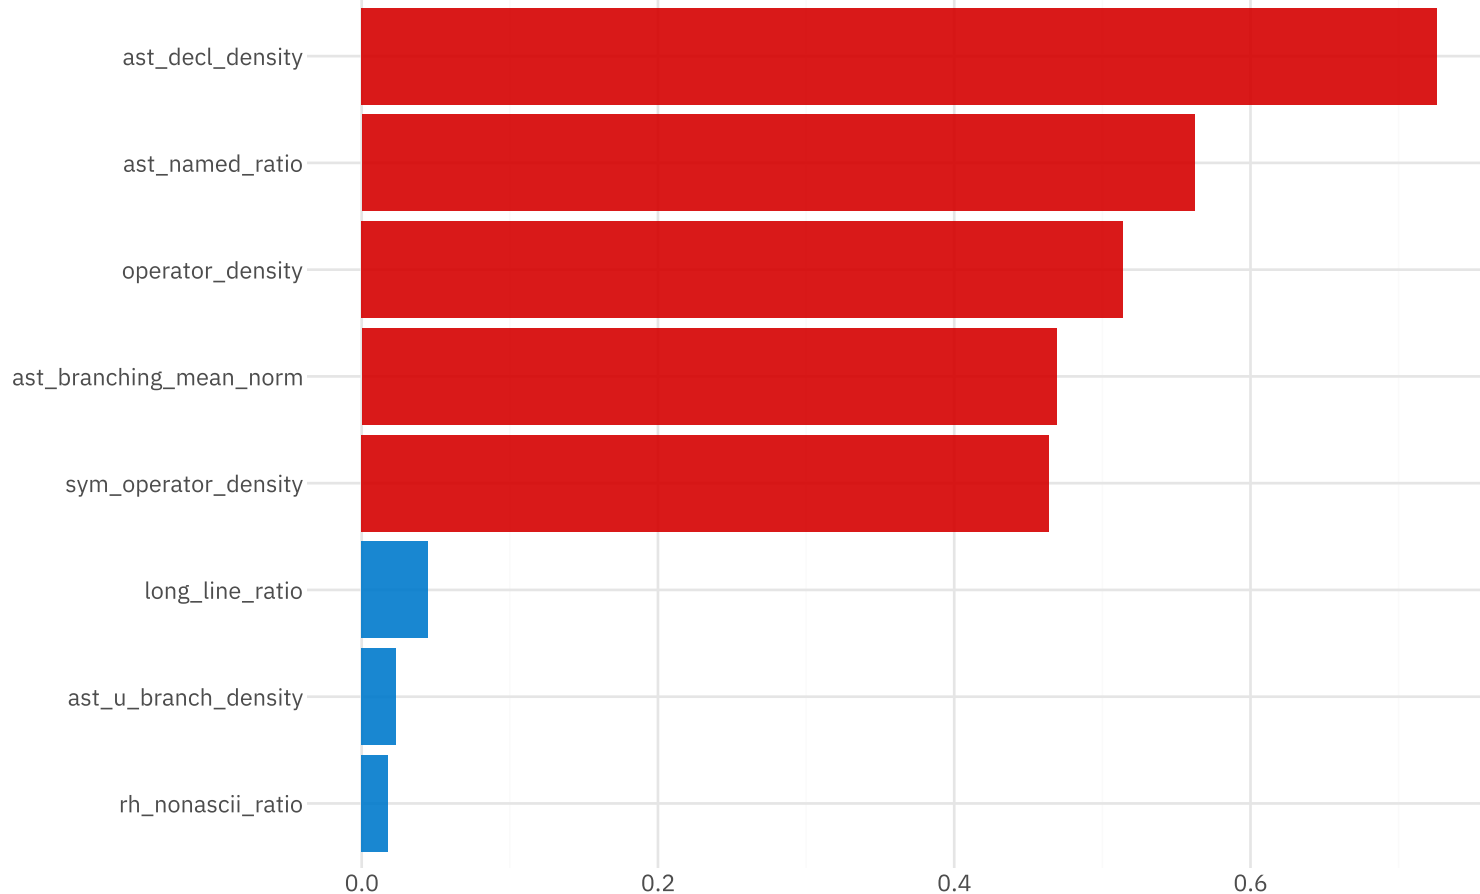

Group

Most stable

Most unstable

KS shift

Supplement: SupplementaryMaterial [file feature_drift_analysis.pdf › figures/feature_drift_analysis.pdf]

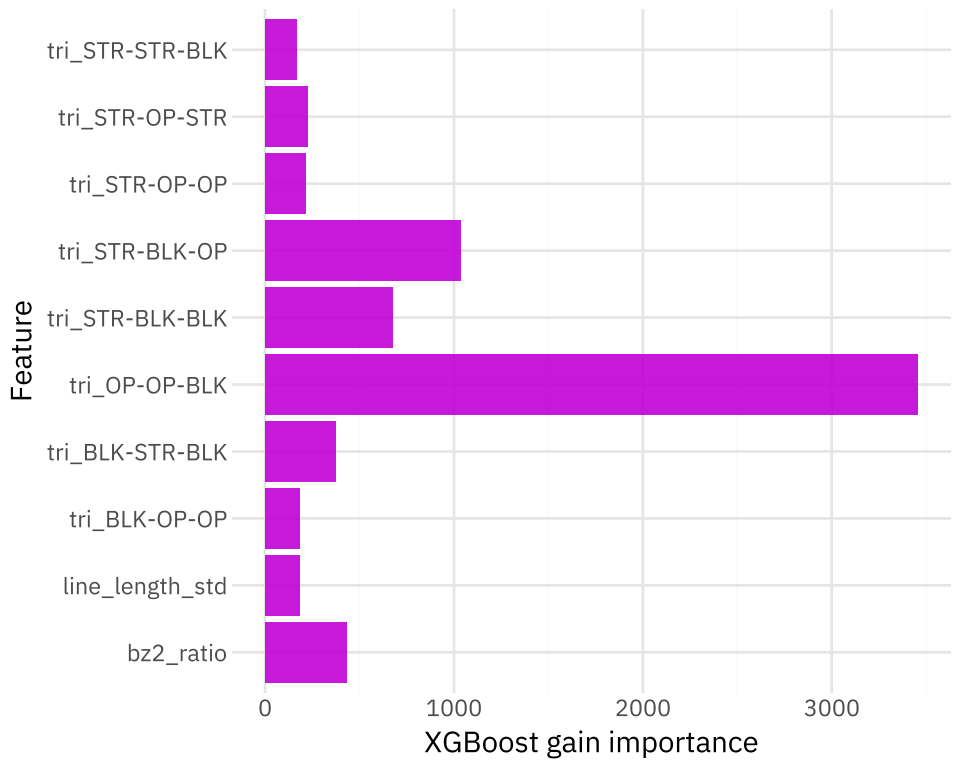

Supplement: SupplementaryMaterial [file feature_importance.pdf › figures/feature_importance.pdf]

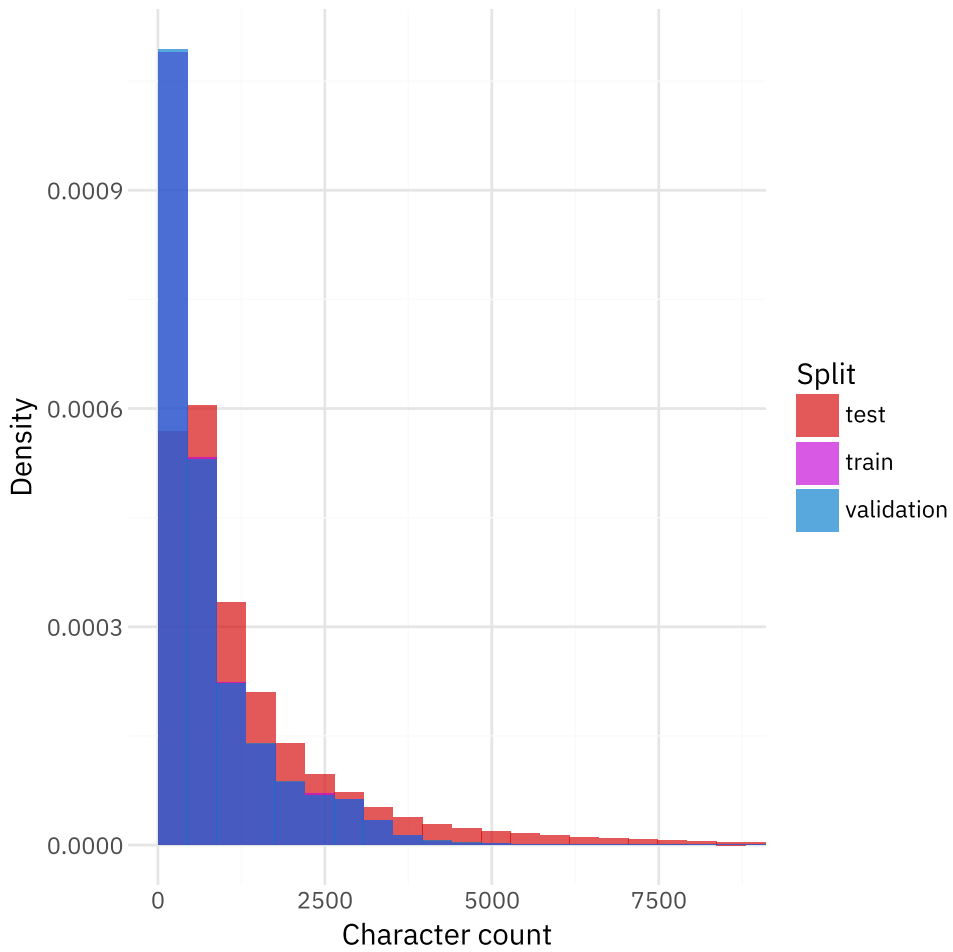

Supplement: SupplementaryMaterial [file train_val_test_length_histogram.pdf › figures/train_val_test_length_histogram.pdf]

UMAP of test structural latent space

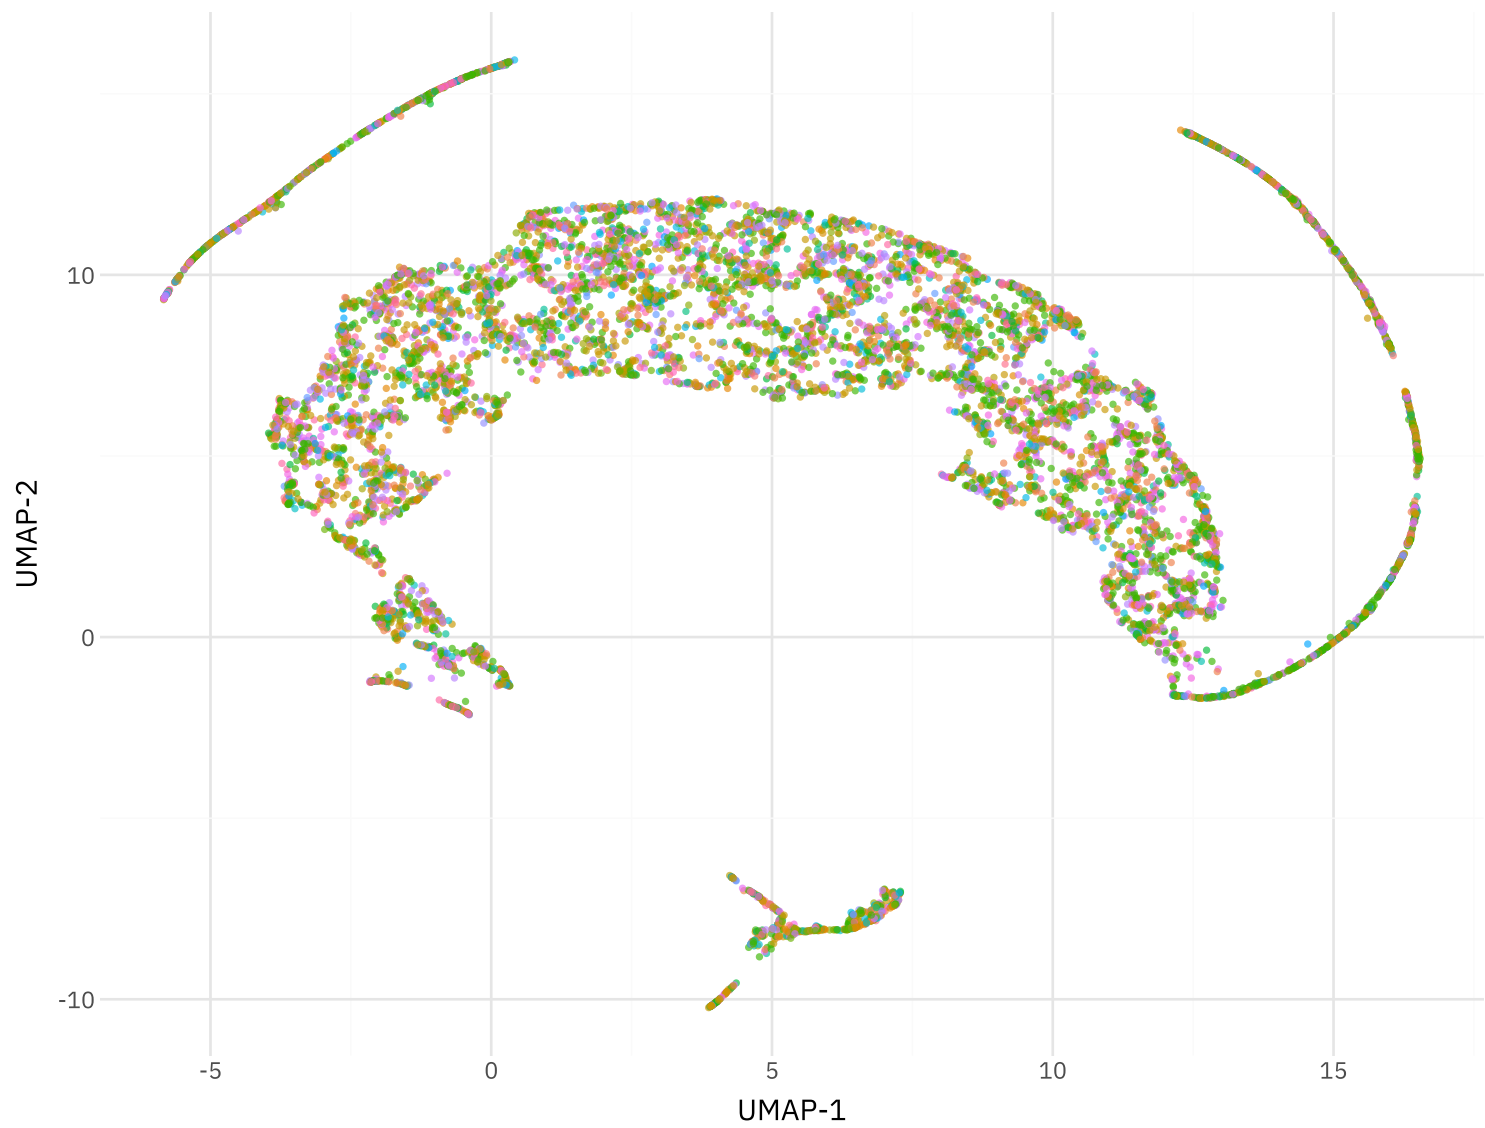

Supplement: SupplementaryMaterial [file umap_latent_space.pdf › figures/umap_latent_space.pdf]

Pairwise agreement matrix across views

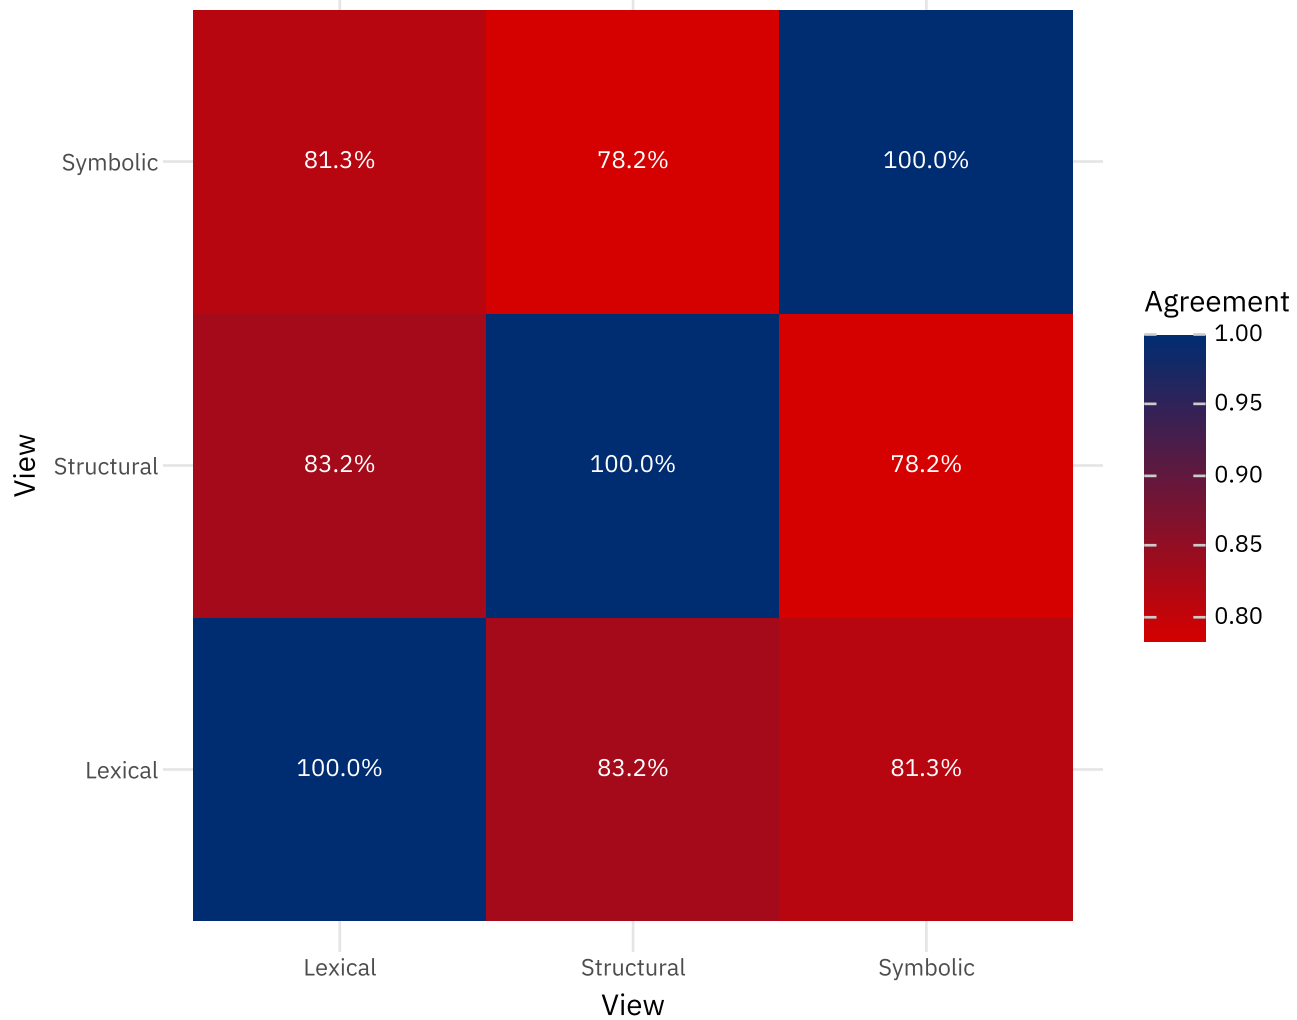

Supplement: SupplementaryMaterial [file view_disagreement_matrix.pdf › figures/view_disagreement_matrix.pdf]
